# Supplementary material for: Myricetin alleviates high-fat diet-induced atherosclerosis in ApoE−/− mice by regulating bile acid metabolism involved in gut microbiota remodeling
Source: Royal Society of Chemistry journal article supplement (doi:10.1039/d5fo00374a), 2025-01-01
Supplement: d5fo00374a1.xlsx [file d5fo00374a1.xlsx]

## Sheet: Weight
Body weight (g)
Weeks	Control	Model	LMYR	HMYR
1	23.4143	23.7143	24.2571	23.5143
2	23.1	26.1	24.8857	25.6571
3	23.3429	28.3286	26.6286	25.7286
4	23.8857	29.3571	27.3286	26.0429
5	25.1429	31.5143	28.2429	27.4857
6	24.8429	31.1857	29.1429	26.9429
7	25.7571	32.1714	29.7429	27.3857
8	26.9286	33.7571	31.3286	29.9429
9	26.4429	33.8286	31.6286	29.6571
10	27.0857	34.0571	32.4857	29.8429
11	27.8714	35.1857	32	30.0857
12	28.2571	36.9571	34.3571	31.4571
13	28.2143	37.9857	35.9857	32.1143
14	28.2143	37.7714	35.2	32.6143
Per-WAT (g)	0.301857	1.55714	1.41429	1.02857
Epi-WAT (g)	0.0598571	0.485714	0.542857	0.338857
Liver (g)	1.03857	1.75714	1.65714	1.37143

## Sheet: Lesion
Ratio	Control	Model	LMYR	HMYR
aorta	6.73948	37.5008	28.1238	15.5862
aortic root	0.924333	15.0217	1.31467	0.699333

## Sheet: Serum indicator
	Control	Model	LMYR	HMYR
HDL (mmol/L)	1.96143	4.08429	4.44429	4.33286
LDL (mmol/L)	6.29143	11.2286	11.0029	11.1943
TG (mmol/L)	3.41714	4.70857	3.02429	2.70571
TC (mmol/L)	13.2057	22.0329	23.3243	22.94
Blood glucose (nmol/L)	5.44286	7.38571	6.98571	5.81429

## Sheet: OTU_taxon_spiecies
	Control	Model	HMYR
d__Bacteria;k__norank_d__Bacteria;p__Actinobacteriota;c__Actinobacteria;o__Bifidobacteriales;f__Bifidobacteriaceae;g__Bifidobacterium;s__Bifidobacterium_mongoliense	0	0.000357225	0.000156029
d__Bacteria;k__norank_d__Bacteria;p__Actinobacteriota;c__Actinobacteria;o__Bifidobacteriales;f__Bifidobacteriaceae;g__Bifidobacterium;s__Bifidobacterium_pseudolongum	0.00634793	8.21207e-06	0.0107085
d__Bacteria;k__norank_d__Bacteria;p__Actinobacteriota;c__Actinobacteria;o__Micrococcales;f__Micrococcaceae;g__Arthrobacter;s__Arthrobacter_alpinus	0	1.23181e-05	3.28483e-05
d__Bacteria;k__norank_d__Bacteria;p__Actinobacteriota;c__Coriobacteriia;o__Coriobacteriales;f__Atopobiaceae;g__Coriobacteriaceae_UCG-002;s__uncultured_bacterium_g__Coriobacteriaceae_UCG-002	0.000340801	0.000176559	0.00212282
d__Bacteria;k__norank_d__Bacteria;p__Actinobacteriota;c__Coriobacteriia;o__Coriobacteriales;f__Eggerthellaceae;g__Enterorhabdus;s__mouse_gut_metagenome_g__Enterorhabdus	0.000780147	0.000127287	0.000234044
d__Bacteria;k__norank_d__Bacteria;p__Actinobacteriota;c__Coriobacteriia;o__Coriobacteriales;f__Eggerthellaceae;g__Enterorhabdus;s__uncultured_bacterium_g__Enterorhabdus	0.00510791	0.00335874	0.00250057
d__Bacteria;k__norank_d__Bacteria;p__Actinobacteriota;c__Coriobacteriia;o__Coriobacteriales;f__Eggerthellaceae;g__Gordonibacter;s__uncultured_bacterium_g__Gordonibacter	0.000722662	1.64241e-05	4.10603e-06
d__Bacteria;k__norank_d__Bacteria;p__Actinobacteriota;c__Coriobacteriia;o__Coriobacteriales;f__Eggerthellaceae;g__Parvibacter;s__unclassified_g__Parvibacter	0.000862267	0.000254574	0.000143711
d__Bacteria;k__norank_d__Bacteria;p__Actinobacteriota;c__Coriobacteriia;o__Coriobacteriales;f__Eggerthellaceae;g__norank_f__Eggerthellaceae;s__uncultured_Coriobacteriales_bacterium_g__norank	0.000377755	0.000201196	0.000110863
d__Bacteria;k__norank_d__Bacteria;p__Bacteroidota;c__Bacteroidia;o__Bacteroidales;f__Bacteroidaceae;g__Bacteroides;s__Bacteroides_acidifaciens	0.000533784	0.00348602	0.00387199
d__Bacteria;k__norank_d__Bacteria;p__Bacteroidota;c__Bacteroidia;o__Bacteroidales;f__Bacteroidaceae;g__Bacteroides;s__Bacteroides_caecimuris	0.00592911	0.0026566	0.00121949
d__Bacteria;k__norank_d__Bacteria;p__Bacteroidota;c__Bacteroidia;o__Bacteroidales;f__Bacteroidaceae;g__Bacteroides;s__Bacteroides_stercorirosoris	0	0	0.000139605
d__Bacteria;k__norank_d__Bacteria;p__Bacteroidota;c__Bacteroidia;o__Bacteroidales;f__Bacteroidaceae;g__Bacteroides;s__unclassified_g__Bacteroides	0.013205	0.0287176	0.0375825
d__Bacteria;k__norank_d__Bacteria;p__Bacteroidota;c__Bacteroidia;o__Bacteroidales;f__Marinifilaceae;g__Odoribacter;s__unclassified_g__Odoribacter	0.00395	0.0121128	0.00181897
d__Bacteria;k__norank_d__Bacteria;p__Bacteroidota;c__Bacteroidia;o__Bacteroidales;f__Marinifilaceae;g__Odoribacter;s__uncultured_bacterium_g__Odoribacter	0.00436061	0.0154551	0.00645469
d__Bacteria;k__norank_d__Bacteria;p__Bacteroidota;c__Bacteroidia;o__Bacteroidales;f__Muribaculaceae;g__Muribaculum;s__uncultured_bacterium_g__Muribaculum	0.0051695	7.80147e-05	0.000316165
d__Bacteria;k__norank_d__Bacteria;p__Bacteroidota;c__Bacteroidia;o__Bacteroidales;f__Muribaculaceae;g__norank_f__Muribaculaceae;s__unclassified_g__norank_f__Muribaculaceae	0.0270834	0.0454251	0.0376318
d__Bacteria;k__norank_d__Bacteria;p__Bacteroidota;c__Bacteroidia;o__Bacteroidales;f__Muribaculaceae;g__norank_f__Muribaculaceae;s__uncultured_Bacteroidales_bacterium_g__norank_f__Muribaculaceae	0.0837631	0.00317396	0.00187646
d__Bacteria;k__norank_d__Bacteria;p__Bacteroidota;c__Bacteroidia;o__Bacteroidales;f__Muribaculaceae;g__norank_f__Muribaculaceae;s__uncultured_Muribaculaceae_bacterium	0	0.000229938	0.000500936
d__Bacteria;k__norank_d__Bacteria;p__Bacteroidota;c__Bacteroidia;o__Bacteroidales;f__Muribaculaceae;g__norank_f__Muribaculaceae;s__uncultured_bacterium_g__norank_f__Muribaculaceae	0.18705	0.04283	0.0382929
d__Bacteria;k__norank_d__Bacteria;p__Bacteroidota;c__Bacteroidia;o__Bacteroidales;f__Muribaculaceae;g__norank_f__Muribaculaceae;s__uncultured_organism_g__norank_f__Muribaculaceae	0.0796858	1.64241e-05	0
d__Bacteria;k__norank_d__Bacteria;p__Bacteroidota;c__Bacteroidia;o__Bacteroidales;f__Prevotellaceae;g__Alloprevotella;s__uncultured_Bacteroidales_bacterium_g__Alloprevotella	0.00815458	0.00351477	0.0010224
d__Bacteria;k__norank_d__Bacteria;p__Bacteroidota;c__Bacteroidia;o__Bacteroidales;f__Prevotellaceae;g__Prevotellaceae_NK3B31_group;s__uncultured_bacterium_g__Prevotellaceae_NK3B31_group	0.0174753	8.21207e-06	0
d__Bacteria;k__norank_d__Bacteria;p__Bacteroidota;c__Bacteroidia;o__Bacteroidales;f__Prevotellaceae;g__Prevotellaceae_UCG-001;s__uncultured_bacterium_g__Prevotellaceae_UCG-001	0.0095958	0	0
d__Bacteria;k__norank_d__Bacteria;p__Bacteroidota;c__Bacteroidia;o__Bacteroidales;f__Rikenellaceae;g__Alistipes;s__Alistipes_inops	0.000771934	0.0153566	0.00847896
d__Bacteria;k__norank_d__Bacteria;p__Bacteroidota;c__Bacteroidia;o__Bacteroidales;f__Rikenellaceae;g__Alistipes;s__Alistipes_sp._cv1	0.000484512	0.000250468	0.000102651
d__Bacteria;k__norank_d__Bacteria;p__Bacteroidota;c__Bacteroidia;o__Bacteroidales;f__Rikenellaceae;g__Alistipes;s__unclassified_g__Alistipes	0.00127287	4.10603e-05	8.21207e-06
d__Bacteria;k__norank_d__Bacteria;p__Bacteroidota;c__Bacteroidia;o__Bacteroidales;f__Rikenellaceae;g__Alistipes;s__uncultured_bacterium_g__Alistipes	0.026718	0.0568111	0.0211009
d__Bacteria;k__norank_d__Bacteria;p__Bacteroidota;c__Bacteroidia;o__Bacteroidales;f__Rikenellaceae;g__Rikenella;s__Rikenella_microfusus_DSM_15922	0.000390073	0	0
d__Bacteria;k__norank_d__Bacteria;p__Bacteroidota;c__Bacteroidia;o__Bacteroidales;f__Rikenellaceae;g__Rikenella;s__uncultured_bacterium_g__Rikenella	0.00252521	0.0147694	0.00502168
d__Bacteria;k__norank_d__Bacteria;p__Bacteroidota;c__Bacteroidia;o__Bacteroidales;f__Rikenellaceae;g__Rikenellaceae_RC9_gut_group;s__unclassified_g__Rikenellaceae_RC9_gut_group	0.00730874	0.0973089	0.0270506
d__Bacteria;k__norank_d__Bacteria;p__Bacteroidota;c__Bacteroidia;o__Bacteroidales;f__Tannerellaceae;g__Parabacteroides;s__Parabacteroides_goldsteinii	3.69543e-05	6.15905e-05	4.10603e-05
d__Bacteria;k__norank_d__Bacteria;p__Bacteroidota;c__Bacteroidia;o__Bacteroidales;f__Tannerellaceae;g__Parabacteroides;s__uncultured_Bacteroidales_bacterium_g__Parabacteroides	0.00481227	0.00511201	0.0061919
d__Bacteria;k__norank_d__Bacteria;p__Bacteroidota;c__Bacteroidia;o__Bacteroidales;f__Tannerellaceae;g__Parabacteroides;s__uncultured_organism_g__Parabacteroides	0.00745656	0.00236508	0.00215156
d__Bacteria;k__norank_d__Bacteria;p__Bacteroidota;c__Bacteroidia;o__Bacteroidales;f__unclassified_o__Bacteroidales;g__unclassified_o__Bacteroidales;s__unclassified_o__Bacteroidales	0.000307953	8.21207e-06	8.21207e-06
d__Bacteria;k__norank_d__Bacteria;p__Bacteroidota;c__Bacteroidia;o__Flavobacteriales;f__Flavobacteriaceae;g__norank_f__Flavobacteriaceae;s__gut_metagenome_g__norank_f__Flavobacteriaceae	0	0	5.74845e-05
d__Bacteria;k__norank_d__Bacteria;p__Campilobacterota;c__Campylobacteria;o__Campylobacterales;f__Helicobacteraceae;g__Helicobacter;s__Helicobacter_ganmani	0	0	0.00413478
d__Bacteria;k__norank_d__Bacteria;p__Campilobacterota;c__Campylobacteria;o__Campylobacterales;f__Helicobacteraceae;g__Helicobacter;s__Helicobacter_hepaticus	0.00224189	0.0108769	0.00916467
d__Bacteria;k__norank_d__Bacteria;p__Cyanobacteria;c__Vampirivibrionia;o__Gastranaerophilales;f__norank_o__Gastranaerophilales;g__norank_f__norank_o__Gastranaerophilales;s__uncultured_bacterium_g__norank_f__norank_o__Gastranaerophilales	0.000254574	0.000291528	3.69543e-05
d__Bacteria;k__norank_d__Bacteria;p__Deferribacterota;c__Deferribacteres;o__Deferribacterales;f__Deferribacteraceae;g__Mucispirillum;s__uncultured_bacterium_g__Mucispirillum	0.00490671	0.00860214	0.0575255
d__Bacteria;k__norank_d__Bacteria;p__Desulfobacterota;c__Desulfovibrionia;o__Desulfovibrionales;f__Desulfovibrionaceae;g__Bilophila;s__uncultured_bacterium_g__Bilophila	0.000344907	0.000964918	0.00199143
d__Bacteria;k__norank_d__Bacteria;p__Desulfobacterota;c__Desulfovibrionia;o__Desulfovibrionales;f__Desulfovibrionaceae;g__Desulfovibrio;s__Desulfovibrio_fairfieldensis	0	0	0
d__Bacteria;k__norank_d__Bacteria;p__Desulfobacterota;c__Desulfovibrionia;o__Desulfovibrionales;f__Desulfovibrionaceae;g__Desulfovibrio;s__unclassified_g__Desulfovibrio	3.28483e-05	0.000390073	0.000689814
d__Bacteria;k__norank_d__Bacteria;p__Desulfobacterota;c__Desulfovibrionia;o__Desulfovibrionales;f__Desulfovibrionaceae;g__Desulfovibrio;s__uncultured_bacterium_g__Desulfovibrio	0.0309759	0.000180666	0.000459876
d__Bacteria;k__norank_d__Bacteria;p__Desulfobacterota;c__Desulfovibrionia;o__Desulfovibrionales;f__Desulfovibrionaceae;g__norank_f__Desulfovibrionaceae;s__uncultured_bacterium_g__norank_f__Desulfovibrionaceae	4.92724e-05	0.0891174	0.148462
d__Bacteria;k__norank_d__Bacteria;p__Firmicutes;c__Bacilli;o__Erysipelotrichales;f__Erysipelatoclostridiaceae;g__Erysipelatoclostridium;s__unclassified_g__Erysipelatoclostridium	0.000468088	0.000151923	0.000102651
d__Bacteria;k__norank_d__Bacteria;p__Firmicutes;c__Bacilli;o__Erysipelotrichales;f__Erysipelatoclostridiaceae;g__Erysipelatoclostridium;s__uncultured_bacterium_g__Erysipelatoclostridium	0.000845843	0	0
d__Bacteria;k__norank_d__Bacteria;p__Firmicutes;c__Bacilli;o__Erysipelotrichales;f__Erysipelotrichaceae;g__Dubosiella;s__uncultured_bacterium_g__Dubosiella	0.00590037	0.00107167	0.00485744
d__Bacteria;k__norank_d__Bacteria;p__Firmicutes;c__Bacilli;o__Erysipelotrichales;f__Erysipelotrichaceae;g__Faecalibaculum;s__Faecalibaculum_rodentium	0.000114969	0.000123181	0.019479
d__Bacteria;k__norank_d__Bacteria;p__Firmicutes;c__Bacilli;o__Erysipelotrichales;f__Erysipelotrichaceae;g__Turicibacter;s__uncultured_bacterium_g__Turicibacter	0.0188056	0.00169579	0.0032684
d__Bacteria;k__norank_d__Bacteria;p__Firmicutes;c__Bacilli;o__Erysipelotrichales;f__Erysipelotrichaceae;g__norank_f__Erysipelotrichaceae;s__unclassified_g__norank_f__Erysipelotrichaceae	0.000541997	0.00344086	0.000254574
d__Bacteria;k__norank_d__Bacteria;p__Firmicutes;c__Bacilli;o__Erysipelotrichales;f__Erysipelotrichaceae;g__norank_f__Erysipelotrichaceae;s__uncultured_Allobaculum_sp._g__norank	0	0	0.00126055
d__Bacteria;k__norank_d__Bacteria;p__Firmicutes;c__Bacilli;o__Erysipelotrichales;f__Erysipelotrichaceae;g__norank_f__Erysipelotrichaceae;s__uncultured_bacterium_g__norank_f__Erysipelotrichaceae	0.000262786	3.69543e-05	0.000110863
d__Bacteria;k__norank_d__Bacteria;p__Firmicutes;c__Bacilli;o__Lactobacillales;f__Aerococcaceae;g__Globicatella;s__uncultured_bacterium_g__Globicatella	0	0.00194626	0.000829419
d__Bacteria;k__norank_d__Bacteria;p__Firmicutes;c__Bacilli;o__Lactobacillales;f__Enterococcaceae;g__Enterococcus;s__Enterococcus_faecalis_g__Enterococcus	6.15905e-05	0.000652859	0.000184772
d__Bacteria;k__norank_d__Bacteria;p__Firmicutes;c__Bacilli;o__Lactobacillales;f__Enterococcaceae;g__Enterococcus;s__uncultured_bacterium_g__Enterococcus	0	0.000180666	4.92724e-05
d__Bacteria;k__norank_d__Bacteria;p__Firmicutes;c__Bacilli;o__Lactobacillales;f__Lactobacillaceae;g__Lactobacillus;s__Lactobacillus_delbrueckii_subsp._bulgaricus	0	0.00314522	0.00105936
d__Bacteria;k__norank_d__Bacteria;p__Firmicutes;c__Bacilli;o__Lactobacillales;f__Lactobacillaceae;g__Lactobacillus;s__Lactobacillus_helveticus	0	0.0031329	0.000940282
d__Bacteria;k__norank_d__Bacteria;p__Firmicutes;c__Bacilli;o__Lactobacillales;f__Lactobacillaceae;g__Lactobacillus;s__Lactobacillus_johnsonii	0.0252891	4.10603e-06	0.00580183
d__Bacteria;k__norank_d__Bacteria;p__Firmicutes;c__Bacilli;o__Lactobacillales;f__Lactobacillaceae;g__Lactobacillus;s__Lactobacillus_kefiri	0	0.00021762	0.000123181
d__Bacteria;k__norank_d__Bacteria;p__Firmicutes;c__Bacilli;o__Lactobacillales;f__Lactobacillaceae;g__Lactobacillus;s__Lactobacillus_murinus	0.0343716	0.0283234	0.02246
d__Bacteria;k__norank_d__Bacteria;p__Firmicutes;c__Bacilli;o__Lactobacillales;f__Lactobacillaceae;g__Lactobacillus;s__Lactobacillus_paracasei	0	8.62267e-05	2.46362e-05
d__Bacteria;k__norank_d__Bacteria;p__Firmicutes;c__Bacilli;o__Lactobacillales;f__Lactobacillaceae;g__Lactobacillus;s__Lactobacillus_plantarum_g__Lactobacillus	0	5.33784e-05	8.21207e-06
d__Bacteria;k__norank_d__Bacteria;p__Firmicutes;c__Bacilli;o__Lactobacillales;f__Lactobacillaceae;g__Lactobacillus;s__Lactobacillus_reuteri	0.0238027	0.000825313	0.00280032
d__Bacteria;k__norank_d__Bacteria;p__Firmicutes;c__Bacilli;o__Lactobacillales;f__Lactobacillaceae;g__Lactobacillus;s__Lactobacillus_uvarum	0	0.000123181	4.51664e-05
d__Bacteria;k__norank_d__Bacteria;p__Firmicutes;c__Bacilli;o__Lactobacillales;f__Lactobacillaceae;g__Lactobacillus;s__unclassified_g__Lactobacillus	7.39086e-05	0.000201196	0.000102651
d__Bacteria;k__norank_d__Bacteria;p__Firmicutes;c__Bacilli;o__Lactobacillales;f__Streptococcaceae;g__Lactococcus;s__Lactococcus_raffinolactis	0	0.000529678	0.000184772
d__Bacteria;k__norank_d__Bacteria;p__Firmicutes;c__Bacilli;o__Lactobacillales;f__Streptococcaceae;g__Lactococcus;s__unclassified_g__Lactococcus	0	0.00434418	0.00179434
d__Bacteria;k__norank_d__Bacteria;p__Firmicutes;c__Bacilli;o__Lactobacillales;f__Streptococcaceae;g__Streptococcus;s__Streptococcus_salivarius_subsp._thermophilus	1.64241e-05	0.0057813	0.00184361
d__Bacteria;k__norank_d__Bacteria;p__Firmicutes;c__Bacilli;o__Lactobacillales;f__Streptococcaceae;g__Streptococcus;s__unclassified_g__Streptococcus	0.000114969	0.00045577	0.00021762
d__Bacteria;k__norank_d__Bacteria;p__Firmicutes;c__Bacilli;o__RF39;f__norank_o__RF39;g__norank_f__norank_o__RF39;s__unclassified_g__norank_f__norank_o__RF39	0.000135499	0	0
d__Bacteria;k__norank_d__Bacteria;p__Firmicutes;c__Bacilli;o__Staphylococcales;f__Staphylococcaceae;g__Staphylococcus;s__Staphylococcus_sciuri	2.46362e-05	3.69543e-05	2.87422e-05
d__Bacteria;k__norank_d__Bacteria;p__Firmicutes;c__Clostridia;o__Christensenellales;f__Christensenellaceae;g__Christensenella;s__Christensenella_minuta	0	0	1.23181e-05
d__Bacteria;k__norank_d__Bacteria;p__Firmicutes;c__Clostridia;o__Christensenellales;f__Christensenellaceae;g__Christensenellaceae_R-7_group;s__unclassified_g__Christensenellaceae_R-7_group	0.000459876	7.80147e-05	1.64241e-05
d__Bacteria;k__norank_d__Bacteria;p__Firmicutes;c__Clostridia;o__Christensenellales;f__Christensenellaceae;g__norank_f__Christensenellaceae;s__unclassified_g__norank_f__Christensenellaceae	1.23181e-05	0.000250468	5.33784e-05
d__Bacteria;k__norank_d__Bacteria;p__Firmicutes;c__Clostridia;o__Christensenellales;f__Christensenellaceae;g__norank_f__Christensenellaceae;s__uncultured_bacterium_g__norank_f__Christensenellaceae	0.000275104	0.000164241	0.000123181
d__Bacteria;k__norank_d__Bacteria;p__Firmicutes;c__Clostridia;o__Christensenellales;f__Christensenellaceae;g__unclassified_f__Christensenellaceae;s__unclassified_f__Christensenellaceae	0	0.000377755	0.000562527
d__Bacteria;k__norank_d__Bacteria;p__Firmicutes;c__Clostridia;o__Clostridia_UCG-014;f__norank_o__Clostridia_UCG-014;g__norank_f__norank_o__Clostridia_UCG-014;s__unclassified_g__norank_f__norank_o__Clostridia_UCG-014	0.0176518	1.23181e-05	0.000102651
d__Bacteria;k__norank_d__Bacteria;p__Firmicutes;c__Clostridia;o__Clostridia_UCG-014;f__norank_o__Clostridia_UCG-014;g__norank_f__norank_o__Clostridia_UCG-014;s__uncultured_bacterium_g__norank_f__norank_o__Clostridia_UCG-014	0.00957117	0.000480406	0.00156851
d__Bacteria;k__norank_d__Bacteria;p__Firmicutes;c__Clostridia;o__Clostridia_UCG-014;f__norank_o__Clostridia_UCG-014;g__norank_f__norank_o__Clostridia_UCG-014;s__uncultured_rumen_bacterium_g__norank_f__norank_o__Clostridia_UCG-014	0.00161778	0	0
d__Bacteria;k__norank_d__Bacteria;p__Firmicutes;c__Clostridia;o__Clostridia_vadinBB60_group;f__norank_o__Clostridia_vadinBB60_group;g__norank_f__norank_o__Clostridia_vadinBB60_group;s__unclassified_g__norank_f__norank_o__Clostridia_vadinBB60_group	0.000135499	0.000114969	2.05302e-05
d__Bacteria;k__norank_d__Bacteria;p__Firmicutes;c__Clostridia;o__Clostridia_vadinBB60_group;f__norank_o__Clostridia_vadinBB60_group;g__norank_f__norank_o__Clostridia_vadinBB60_group;s__uncultured_bacterium_g__norank_f__norank_o__Clostridia_vadinBB60_group	0.000336695	0.0148392	0.00303025
d__Bacteria;k__norank_d__Bacteria;p__Firmicutes;c__Clostridia;o__Clostridiales;f__Clostridiaceae;g__Clostridium_sensu_stricto_1;s__Clostridium_isatidis	0	9.85448e-05	2.87422e-05
d__Bacteria;k__norank_d__Bacteria;p__Firmicutes;c__Clostridia;o__Clostridiales;f__Clostridiaceae;g__Clostridium_sensu_stricto_1;s__uncultured_bacterium_g__Clostridium_sensu_stricto_1	0.0038802	0.0049026	0.00794518
d__Bacteria;k__norank_d__Bacteria;p__Firmicutes;c__Clostridia;o__Eubacteriales;f__Anaerofustaceae;g__Anaerofustis;s__unclassified_g__Anaerofustis	5.74845e-05	0	0
d__Bacteria;k__norank_d__Bacteria;p__Firmicutes;c__Clostridia;o__Lachnospirales;f__Lachnospiraceae;g__A2;s__unclassified_g__A2	8.21207e-06	0.00196679	0.00307953
d__Bacteria;k__norank_d__Bacteria;p__Firmicutes;c__Clostridia;o__Lachnospirales;f__Lachnospiraceae;g__A2;s__uncultured_bacterium_g__A2	0.000771934	0.00105936	0.000225832
d__Bacteria;k__norank_d__Bacteria;p__Firmicutes;c__Clostridia;o__Lachnospirales;f__Lachnospiraceae;g__ASF356;s__unclassified_g__ASF356	1.64241e-05	5.74845e-05	5.74845e-05
d__Bacteria;k__norank_d__Bacteria;p__Firmicutes;c__Clostridia;o__Lachnospirales;f__Lachnospiraceae;g__ASF356;s__uncultured_bacterium_g__ASF356	0.00124413	0.00162188	0.00134678
d__Bacteria;k__norank_d__Bacteria;p__Firmicutes;c__Clostridia;o__Lachnospirales;f__Lachnospiraceae;g__Acetatifactor;s__uncultured_bacterium_g__Acetatifactor	0.000439346	0.000977236	0.00178612
d__Bacteria;k__norank_d__Bacteria;p__Firmicutes;c__Clostridia;o__Lachnospirales;f__Lachnospiraceae;g__Blautia;s__Lachnospiraceae_bacterium_28-4	0.00105525	0.139227	0.0474904
d__Bacteria;k__norank_d__Bacteria;p__Firmicutes;c__Clostridia;o__Lachnospirales;f__Lachnospiraceae;g__Blautia;s__Lachnospiraceae_bacterium_DW59	0.000254574	3.28483e-05	0
d__Bacteria;k__norank_d__Bacteria;p__Firmicutes;c__Clostridia;o__Lachnospirales;f__Lachnospiraceae;g__Blautia;s__unclassified_g__Blautia	0.00151923	0.00120307	0.000997766
d__Bacteria;k__norank_d__Bacteria;p__Firmicutes;c__Clostridia;o__Lachnospirales;f__Lachnospiraceae;g__Eisenbergiella;s__uncultured_bacterium_g__Eisenbergiella	0.000131393	0	0
d__Bacteria;k__norank_d__Bacteria;p__Firmicutes;c__Clostridia;o__Lachnospirales;f__Lachnospiraceae;g__Eubacterium_ventriosum_group;s__unclassified_g__Eubacterium_ventriosum_group	0.00110042	0	0.00043524
d__Bacteria;k__norank_d__Bacteria;p__Firmicutes;c__Clostridia;o__Lachnospirales;f__Lachnospiraceae;g__Eubacterium_xylanophilum_group;s__uncultured_bacterium_g__Eubacterium_xylanophilum_group	0.0023158	1.23181e-05	8.21207e-06
d__Bacteria;k__norank_d__Bacteria;p__Firmicutes;c__Clostridia;o__Lachnospirales;f__Lachnospiraceae;g__GCA-900066575;s__uncultured_bacterium_g__GCA-900066575	0.00298919	0.00303847	0.00225421
d__Bacteria;k__norank_d__Bacteria;p__Firmicutes;c__Clostridia;o__Lachnospirales;f__Lachnospiraceae;g__Lachnoclostridium;s__Dorea_sp._5-2	0.0004763	0.00213103	0.00320681
d__Bacteria;k__norank_d__Bacteria;p__Firmicutes;c__Clostridia;o__Lachnospirales;f__Lachnospiraceae;g__Lachnoclostridium;s__unclassified_g__Lachnoclostridium	0.00426206	0.0118911	0.00254985
d__Bacteria;k__norank_d__Bacteria;p__Firmicutes;c__Clostridia;o__Lachnospirales;f__Lachnospiraceae;g__Lachnoclostridium;s__uncultured_bacterium_g__Lachnoclostridium	0.00978057	0.00411835	0.00493135
d__Bacteria;k__norank_d__Bacteria;p__Firmicutes;c__Clostridia;o__Lachnospirales;f__Lachnospiraceae;g__Lachnospiraceae_FCS020_group;s__uncultured_bacterium_g__Lachnospiraceae_FCS020_group	0.000324377	0.00077604	0.000710344
d__Bacteria;k__norank_d__Bacteria;p__Firmicutes;c__Clostridia;o__Lachnospirales;f__Lachnospiraceae;g__Lachnospiraceae_NK4A136_group;s__Lachnospiraceae_bacterium_A4	0.000209408	0	0
d__Bacteria;k__norank_d__Bacteria;p__Firmicutes;c__Clostridia;o__Lachnospirales;f__Lachnospiraceae;g__Lachnospiraceae_NK4A136_group;s__Lachnospiraceae_bacterium_COE1	0.000525572	0	0.000192984
d__Bacteria;k__norank_d__Bacteria;p__Firmicutes;c__Clostridia;o__Lachnospirales;f__Lachnospiraceae;g__Lachnospiraceae_NK4A136_group;s__unclassified_g__Lachnospiraceae_NK4A136_group	0.0228419	0.0011579	0.0103144
d__Bacteria;k__norank_d__Bacteria;p__Firmicutes;c__Clostridia;o__Lachnospirales;f__Lachnospiraceae;g__Lachnospiraceae_NK4A136_group;s__uncultured_Clostridiales_bacterium_g__Lachnospiraceae_NK4A136_group	0.0620216	0.000316165	0.00257448
d__Bacteria;k__norank_d__Bacteria;p__Firmicutes;c__Clostridia;o__Lachnospirales;f__Lachnospiraceae;g__Lachnospiraceae_NK4A136_group;s__uncultured_bacterium_g__Lachnospiraceae_NK4A136_group	0.0296374	0.000927964	0.00545692
d__Bacteria;k__norank_d__Bacteria;p__Firmicutes;c__Clostridia;o__Lachnospirales;f__Lachnospiraceae;g__Lachnospiraceae_UCG-001;s__unclassified_g__Lachnospiraceae_UCG-001	0.000468088	0	0
d__Bacteria;k__norank_d__Bacteria;p__Firmicutes;c__Clostridia;o__Lachnospirales;f__Lachnospiraceae;g__Lachnospiraceae_UCG-001;s__uncultured_bacterium_g__Lachnospiraceae_UCG-001	0.000147817	0	0
d__Bacteria;k__norank_d__Bacteria;p__Firmicutes;c__Clostridia;o__Lachnospirales;f__Lachnospiraceae;g__Lachnospiraceae_UCG-006;s__uncultured_bacterium_g__Lachnospiraceae_UCG-006	0.00445915	0.0057813	0.00879923
d__Bacteria;k__norank_d__Bacteria;p__Firmicutes;c__Clostridia;o__Lachnospirales;f__Lachnospiraceae;g__Lachnospiraceae_UCG-010;s__uncultured_bacterium_g__Lachnospiraceae_UCG-010	4.92724e-05	4.92724e-05	3.69543e-05
d__Bacteria;k__norank_d__Bacteria;p__Firmicutes;c__Clostridia;o__Lachnospirales;f__Lachnospiraceae;g__Marvinbryantia;s__unclassified_g__Marvinbryantia	0.000164241	0.000135499	6.15905e-05
d__Bacteria;k__norank_d__Bacteria;p__Firmicutes;c__Clostridia;o__Lachnospirales;f__Lachnospiraceae;g__Marvinbryantia;s__uncultured_bacterium_g__Marvinbryantia	0.000866373	0	0
d__Bacteria;k__norank_d__Bacteria;p__Firmicutes;c__Clostridia;o__Lachnospirales;f__Lachnospiraceae;g__Roseburia;s__Clostridium_sp._Clone-44	9.44388e-05	0	6.56965e-05
d__Bacteria;k__norank_d__Bacteria;p__Firmicutes;c__Clostridia;o__Lachnospirales;f__Lachnospiraceae;g__Roseburia;s__Eubacterium_sp._14-2	2.87422e-05	0.000344907	0.004221
d__Bacteria;k__norank_d__Bacteria;p__Firmicutes;c__Clostridia;o__Lachnospirales;f__Lachnospiraceae;g__Roseburia;s__uncultured_bacterium_g__Roseburia	0.00100187	0.0111972	0.00924268
d__Bacteria;k__norank_d__Bacteria;p__Firmicutes;c__Clostridia;o__Lachnospirales;f__Lachnospiraceae;g__Roseburia;s__uncultured_organism_g__Roseburia	0.000858161	0.00297687	0.0020407
d__Bacteria;k__norank_d__Bacteria;p__Firmicutes;c__Clostridia;o__Lachnospirales;f__Lachnospiraceae;g__Tuzzerella;s__uncultured_bacterium_g__Tuzzerella	0.000357225	0.00429491	0.00992018
d__Bacteria;k__norank_d__Bacteria;p__Firmicutes;c__Clostridia;o__Lachnospirales;f__Lachnospiraceae;g__norank_f__Lachnospiraceae;s__Clostridium_sp._Clone-49	0.00308774	2.46362e-05	5.74845e-05
d__Bacteria;k__norank_d__Bacteria;p__Firmicutes;c__Clostridia;o__Lachnospirales;f__Lachnospiraceae;g__norank_f__Lachnospiraceae;s__Clostridium_sp._Culture-27	0.000459876	0	1.64241e-05
d__Bacteria;k__norank_d__Bacteria;p__Firmicutes;c__Clostridia;o__Lachnospirales;f__Lachnospiraceae;g__norank_f__Lachnospiraceae;s__mouse_gut_metagenome_g__norank	0.0059907	0.00093207	0.00245541
d__Bacteria;k__norank_d__Bacteria;p__Firmicutes;c__Clostridia;o__Lachnospirales;f__Lachnospiraceae;g__norank_f__Lachnospiraceae;s__unclassified_g__norank_f__Lachnospiraceae	0.0106593	0.00369543	0.00742782
d__Bacteria;k__norank_d__Bacteria;p__Firmicutes;c__Clostridia;o__Lachnospirales;f__Lachnospiraceae;g__norank_f__Lachnospiraceae;s__uncultured_bacterium_g__norank_f__Lachnospiraceae	0.0133857	0.0234619	0.0204522
d__Bacteria;k__norank_d__Bacteria;p__Firmicutes;c__Clostridia;o__Lachnospirales;f__Lachnospiraceae;g__unclassified_f__Lachnospiraceae;s__unclassified_f__Lachnospiraceae	0.0377509	0.030282	0.0327292
d__Bacteria;k__norank_d__Bacteria;p__Firmicutes;c__Clostridia;o__Monoglobales;f__Monoglobaceae;g__Monoglobus;s__unclassified_g__Monoglobus	0.000702132	0	4.10603e-06
d__Bacteria;k__norank_d__Bacteria;p__Firmicutes;c__Clostridia;o__Oscillospirales;f__Butyricicoccaceae;g__Butyricicoccus;s__unclassified_g__Butyricicoccus	0.000221726	0	4.10603e-06
d__Bacteria;k__norank_d__Bacteria;p__Firmicutes;c__Clostridia;o__Oscillospirales;f__Butyricicoccaceae;g__Butyricicoccus;s__uncultured_bacterium_g__Butyricicoccus	0.000390073	0.000632329	0.000661072
d__Bacteria;k__norank_d__Bacteria;p__Firmicutes;c__Clostridia;o__Oscillospirales;f__Butyricicoccaceae;g__UCG-009;s__unclassified_g__UCG-009	0.000320271	0.00316165	0.00902506
d__Bacteria;k__norank_d__Bacteria;p__Firmicutes;c__Clostridia;o__Oscillospirales;f__Butyricicoccaceae;g__UCG-009;s__uncultured_bacterium_g__UCG-009	0.000110863	0.000500936	0.00053789
d__Bacteria;k__norank_d__Bacteria;p__Firmicutes;c__Clostridia;o__Oscillospirales;f__Clostridium_methylpentosum_group;g__norank_f__Clostridium_methylpentosum_group;s__uncultured_bacterium_g__norank_f__Clostridium_methylpentosum_group	0	0.000291528	8.21207e-06
d__Bacteria;k__norank_d__Bacteria;p__Firmicutes;c__Clostridia;o__Oscillospirales;f__Eubacterium_coprostanoligenes_group;g__norank_f__Eubacterium_coprostanoligenes_group;s__gut_metagenome_g__norank_f__Eubacterium_coprostanoligenes_group	0.000603587	0	0
d__Bacteria;k__norank_d__Bacteria;p__Firmicutes;c__Clostridia;o__Oscillospirales;f__Eubacterium_coprostanoligenes_group;g__norank_f__Eubacterium_coprostanoligenes_group;s__unclassified_g__norank_f__Eubacterium_coprostanoligenes_group	0	0.00075551	0.000402391
d__Bacteria;k__norank_d__Bacteria;p__Firmicutes;c__Clostridia;o__Oscillospirales;f__Eubacterium_coprostanoligenes_group;g__norank_f__Eubacterium_coprostanoligenes_group;s__uncultured_bacterium_g__norank_f__Eubacterium_coprostanoligenes_group	0	0.00249647	0.00270588
d__Bacteria;k__norank_d__Bacteria;p__Firmicutes;c__Clostridia;o__Oscillospirales;f__Oscillospiraceae;g__Colidextribacter;s__unclassified_g__Colidextribacter	8.21207e-05	0.000480406	0.000698026
d__Bacteria;k__norank_d__Bacteria;p__Firmicutes;c__Clostridia;o__Oscillospirales;f__Oscillospiraceae;g__Colidextribacter;s__uncultured_Clostridiales_bacterium_g__Colidextribacter	0	0.000102651	0.000229938
d__Bacteria;k__norank_d__Bacteria;p__Firmicutes;c__Clostridia;o__Oscillospirales;f__Oscillospiraceae;g__Colidextribacter;s__uncultured_bacterium_g__Colidextribacter	0.00645058	0.0366874	0.0550866
d__Bacteria;k__norank_d__Bacteria;p__Firmicutes;c__Clostridia;o__Oscillospirales;f__Oscillospiraceae;g__Intestinimonas;s__uncultured_bacterium_g__Intestinimonas	0.00202017	0.0173685	0.0176436
d__Bacteria;k__norank_d__Bacteria;p__Firmicutes;c__Clostridia;o__Oscillospirales;f__Oscillospiraceae;g__NK4A214_group;s__unclassified_g__NK4A214_group	0.000792465	7.39086e-05	0.000151923
d__Bacteria;k__norank_d__Bacteria;p__Firmicutes;c__Clostridia;o__Oscillospirales;f__Oscillospiraceae;g__NK4A214_group;s__uncultured_bacterium_g__NK4A214_group	6.15905e-05	0	0
d__Bacteria;k__norank_d__Bacteria;p__Firmicutes;c__Clostridia;o__Oscillospirales;f__Oscillospiraceae;g__Oscillibacter;s__unclassified_g__Oscillibacter	0.00194626	0.00441399	0.00967382
d__Bacteria;k__norank_d__Bacteria;p__Firmicutes;c__Clostridia;o__Oscillospirales;f__Oscillospiraceae;g__Oscillibacter;s__uncultured_bacterium_g__Oscillibacter	0.00275104	0.00773987	0.0225052
d__Bacteria;k__norank_d__Bacteria;p__Firmicutes;c__Clostridia;o__Oscillospirales;f__Oscillospiraceae;g__UCG-005;s__unclassified_g__UCG-005	6.56965e-05	1.23181e-05	7.80147e-05
d__Bacteria;k__norank_d__Bacteria;p__Firmicutes;c__Clostridia;o__Oscillospirales;f__Oscillospiraceae;g__UCG-005;s__uncultured_Clostridiales_bacterium_g__UCG-005	0.000262786	0	4.10603e-06
d__Bacteria;k__norank_d__Bacteria;p__Firmicutes;c__Clostridia;o__Oscillospirales;f__Oscillospiraceae;g__norank_f__Oscillospiraceae;s__unclassified_g__norank_f__Oscillospiraceae	0.0045577	0.00837631	0.00597428
d__Bacteria;k__norank_d__Bacteria;p__Firmicutes;c__Clostridia;o__Oscillospirales;f__Oscillospiraceae;g__norank_f__Oscillospiraceae;s__uncultured_Clostridiales_bacterium_g__norank_f__Oscillospiraceae	0.00794928	4.10603e-06	4.10603e-06
d__Bacteria;k__norank_d__Bacteria;p__Firmicutes;c__Clostridia;o__Oscillospirales;f__Oscillospiraceae;g__norank_f__Oscillospiraceae;s__uncultured_bacterium_g__norank_f__Oscillospiraceae	0.00695152	0.0223204	0.0648302
d__Bacteria;k__norank_d__Bacteria;p__Firmicutes;c__Clostridia;o__Oscillospirales;f__Oscillospiraceae;g__unclassified_f__Oscillospiraceae;s__unclassified_f__Oscillospiraceae	0.00412246	0.0120841	0.0150445
d__Bacteria;k__norank_d__Bacteria;p__Firmicutes;c__Clostridia;o__Oscillospirales;f__Ruminococcaceae;g__Anaerotruncus;s__unclassified_g__Anaerotruncus	2.05302e-05	0.000307953	0.000418815
d__Bacteria;k__norank_d__Bacteria;p__Firmicutes;c__Clostridia;o__Oscillospirales;f__Ruminococcaceae;g__Anaerotruncus;s__uncultured_bacterium_g__Anaerotruncus	0.000812995	0.00855698	0.0103185
d__Bacteria;k__norank_d__Bacteria;p__Firmicutes;c__Clostridia;o__Oscillospirales;f__Ruminococcaceae;g__Candidatus_Soleaferrea;s__Ruminococcaceae_bacterium_GD6	8.62267e-05	0.000114969	9.03328e-05
d__Bacteria;k__norank_d__Bacteria;p__Firmicutes;c__Clostridia;o__Oscillospirales;f__Ruminococcaceae;g__Candidatus_Soleaferrea;s__unclassified_g__Candidatus_Soleaferrea	1.64241e-05	1.64241e-05	7.39086e-05
d__Bacteria;k__norank_d__Bacteria;p__Firmicutes;c__Clostridia;o__Oscillospirales;f__Ruminococcaceae;g__Eubacterium_siraeum_group;s__unclassified_g__Eubacterium_siraeum_group	0.00256627	0	0
d__Bacteria;k__norank_d__Bacteria;p__Firmicutes;c__Clostridia;o__Oscillospirales;f__Ruminococcaceae;g__Harryflintia;s__uncultured_bacterium_g__Harryflintia	0.000192984	0.00138373	0.00141248
d__Bacteria;k__norank_d__Bacteria;p__Firmicutes;c__Clostridia;o__Oscillospirales;f__Ruminococcaceae;g__Negativibacillus;s__unclassified_g__Negativibacillus	0.000357225	0.00424564	0.003059
d__Bacteria;k__norank_d__Bacteria;p__Firmicutes;c__Clostridia;o__Oscillospirales;f__Ruminococcaceae;g__Ruminococcus;s__unclassified_g__Ruminococcus	0.000123181	0	0
d__Bacteria;k__norank_d__Bacteria;p__Firmicutes;c__Clostridia;o__Oscillospirales;f__Ruminococcaceae;g__UBA1819;s__uncultured_bacterium_g__UBA1819	0.00189699	4.51664e-05	2.05302e-05
d__Bacteria;k__norank_d__Bacteria;p__Firmicutes;c__Clostridia;o__Oscillospirales;f__Ruminococcaceae;g__norank_f__Ruminococcaceae;s__Acutalibacter_muris	0.000915646	0.00161367	0.00136731
d__Bacteria;k__norank_d__Bacteria;p__Firmicutes;c__Clostridia;o__Oscillospirales;f__Ruminococcaceae;g__norank_f__Ruminococcaceae;s__Clostridium_leptum_g__norank	0.000500936	4.10603e-05	2.46362e-05
d__Bacteria;k__norank_d__Bacteria;p__Firmicutes;c__Clostridia;o__Oscillospirales;f__Ruminococcaceae;g__norank_f__Ruminococcaceae;s__unclassified_g__norank_f__Ruminococcaceae	0.00369132	0.00376523	0.00385146
d__Bacteria;k__norank_d__Bacteria;p__Firmicutes;c__Clostridia;o__Oscillospirales;f__Ruminococcaceae;g__norank_f__Ruminococcaceae;s__uncultured_Clostridiales_bacterium_g__norank_f__Ruminococcaceae	0.000361331	0.00498062	0.004763
d__Bacteria;k__norank_d__Bacteria;p__Firmicutes;c__Clostridia;o__Oscillospirales;f__Ruminococcaceae;g__norank_f__Ruminococcaceae;s__uncultured_bacterium_g__norank_f__Ruminococcaceae	9.85448e-05	0.00328483	0.00381861
d__Bacteria;k__norank_d__Bacteria;p__Firmicutes;c__Clostridia;o__Oscillospirales;f__Ruminococcaceae;g__unclassified_f__Ruminococcaceae;s__unclassified_f__Ruminococcaceae	0.0014946	0.0128971	0.00881155
d__Bacteria;k__norank_d__Bacteria;p__Firmicutes;c__Clostridia;o__Oscillospirales;f__UCG-010;g__norank_f__UCG-010;s__unclassified_g__norank_f__UCG-010	8.21207e-05	0	8.21207e-06
d__Bacteria;k__norank_d__Bacteria;p__Firmicutes;c__Clostridia;o__Oscillospirales;f__UCG-010;g__norank_f__UCG-010;s__uncultured_organism_g__norank_f__UCG-010	0.000303847	0.0010183	0.0004763
d__Bacteria;k__norank_d__Bacteria;p__Firmicutes;c__Clostridia;o__Peptococcales;f__Peptococcaceae;g__Peptococcus;s__uncultured_bacterium_g__Peptococcus	0.000156029	0	0.000303847
d__Bacteria;k__norank_d__Bacteria;p__Firmicutes;c__Clostridia;o__Peptococcales;f__Peptococcaceae;g__norank_f__Peptococcaceae;s__unclassified_g__norank_f__Peptococcaceae	0.000168347	0	0
d__Bacteria;k__norank_d__Bacteria;p__Firmicutes;c__Clostridia;o__Peptococcales;f__Peptococcaceae;g__norank_f__Peptococcaceae;s__uncultured_bacterium_g__norank_f__Peptococcaceae	0.00175328	0.00195858	0.001704
d__Bacteria;k__norank_d__Bacteria;p__Firmicutes;c__Clostridia;o__Peptostreptococcales-Tissierellales;f__Anaerovoracaceae;g__Anaerovorax;s__uncultured_bacterium_g__Anaerovorax	0.000406497	0.000114969	0.00067339
d__Bacteria;k__norank_d__Bacteria;p__Firmicutes;c__Clostridia;o__Peptostreptococcales-Tissierellales;f__Anaerovoracaceae;g__Eubacterium_brachy_group;s__uncultured_bacterium_g__Eubacterium_brachy_group	0.000410603	0.000743192	0.000533784
d__Bacteria;k__norank_d__Bacteria;p__Firmicutes;c__Clostridia;o__Peptostreptococcales-Tissierellales;f__Anaerovoracaceae;g__Eubacterium_nodatum_group;s__uncultured_bacterium_g__Eubacterium_nodatum_group	0.000685708	0.00308363	0.00154797
d__Bacteria;k__norank_d__Bacteria;p__Firmicutes;c__Clostridia;o__Peptostreptococcales-Tissierellales;f__Anaerovoracaceae;g__Family_XIII_AD3011_group;s__unclassified_g__XIII_AD3011_group	0.000451664	0.00135089	0.000821207
d__Bacteria;k__norank_d__Bacteria;p__Firmicutes;c__Clostridia;o__Peptostreptococcales-Tissierellales;f__Anaerovoracaceae;g__Family_XIII_AD3011_group;s__uncultured_bacterium_g__XIII_AD3011_group	0.000213514	0	0
d__Bacteria;k__norank_d__Bacteria;p__Firmicutes;c__Clostridia;o__Peptostreptococcales-Tissierellales;f__Anaerovoracaceae;g__Family_XIII_UCG-001;s__uncultured_bacterium_g__XIII_UCG-001	0.000110863	2.05302e-05	2.46362e-05
d__Bacteria;k__norank_d__Bacteria;p__Firmicutes;c__Clostridia;o__Peptostreptococcales-Tissierellales;f__Anaerovoracaceae;g__unclassified_f__Anaerovoracaceae;s__unclassified_f__Anaerovoracaceae	2.05302e-05	0.000127287	0.000283316
d__Bacteria;k__norank_d__Bacteria;p__Firmicutes;c__Clostridia;o__Peptostreptococcales-Tissierellales;f__Peptostreptococcaceae;g__Romboutsia;s__Romboutsia_ilealis	0	0.0238766	0.0413847
d__Bacteria;k__norank_d__Bacteria;p__Firmicutes;c__Clostridia;o__Peptostreptococcales-Tissierellales;f__Peptostreptococcaceae;g__unclassified_f__Peptostreptococcaceae;s__unclassified_f__Peptostreptococcaceae	0	2.46362e-05	0.000135499
d__Bacteria;k__norank_d__Bacteria;p__Firmicutes;c__Clostridia;o__unclassified_c__Clostridia;f__unclassified_c__Clostridia;g__unclassified_c__Clostridia;s__unclassified_c__Clostridia	0.000110863	0.000287422	0.000336695
d__Bacteria;k__norank_d__Bacteria;p__Patescibacteria;c__Saccharimonadia;o__Saccharimonadales;f__Saccharimonadaceae;g__Candidatus_Saccharimonas;s__uncultured_bacterium_g__Candidatus_Saccharimonas	0.00286601	0.00105936	0.000513254
d__Bacteria;k__norank_d__Bacteria;p__Proteobacteria;c__Alphaproteobacteria;o__Rhodospirillales;f__norank_o__Rhodospirillales;g__norank_f__norank_o__Rhodospirillales;s__gut_metagenome_g__norank	4.92724e-05	3.28483e-05	0.000114969
d__Bacteria;k__norank_d__Bacteria;p__Proteobacteria;c__Alphaproteobacteria;o__Sphingomonadales;f__Sphingomonadaceae;g__DSSF69;s__Hankyongella_aquatica	4.10603e-06	1.23181e-05	4.92724e-05
d__Bacteria;k__norank_d__Bacteria;p__Proteobacteria;c__Gammaproteobacteria;o__Burkholderiales;f__Burkholderiaceae;g__Burkholderia-Caballeronia-Paraburkholderia;s__unclassified_g__Burkholderia-Caballeronia-Paraburkholderia	2.46362e-05	5.33784e-05	4.10603e-05
d__Bacteria;k__norank_d__Bacteria;p__Proteobacteria;c__Gammaproteobacteria;o__Burkholderiales;f__Sutterellaceae;g__Parasutterella;s__uncultured_bacterium_g__Parasutterella	0.00103472	8.21207e-06	8.21207e-06
d__Bacteria;k__norank_d__Bacteria;p__Proteobacteria;c__Gammaproteobacteria;o__Enterobacterales;f__Enterobacteriaceae;g__Escherichia-Shigella;s__Escherichia_coli_g__Escherichia-Shigella	5.33784e-05	0.00165063	0.000451664
d__Bacteria;k__norank_d__Bacteria;p__Proteobacteria;c__Gammaproteobacteria;o__Oceanospirillales;f__Halomonadaceae;g__Halomonas;s__unclassified_g__Halomonas	8.62267e-05	3.69543e-05	0
d__Bacteria;k__norank_d__Bacteria;p__Proteobacteria;c__Gammaproteobacteria;o__Pseudomonadales;f__Moraxellaceae;g__Psychrobacter;s__Psychrobacter_cibarius	0	2.46362e-05	0.000156029
d__Bacteria;k__norank_d__Bacteria;p__Verrucomicrobiota;c__Verrucomicrobiae;o__Verrucomicrobiales;f__Akkermansiaceae;g__Akkermansia;s__Akkermansia_muciniphila	0.0194626	0.00946441	0.00126055
d__Bacteria;k__norank_d__Bacteria;p__unclassified_k__norank_d__Bacteria;c__unclassified_k__norank_d__Bacteria;o__unclassified_k__norank_d__Bacteria;f__unclassified_k__norank_d__Bacteria;g__unclassified_k__norank_d__Bacteria;s__unclassified_k__norank_d__Bacteria	7.80147e-05	0	8.21207e-06

## Sheet: metabolites
	Control	Model	HMYR
Oxoglutaric acid	2780.29	13369.3	11954.6
L-Glutamine	21031.6	38565.6	36826
4-Bromophenol	6371.71	6949.71	6623
Uridine	114431	39652.6	31173.3
Linoleic acid	3.01589e+06	1.11551e+06	1.00674e+06
Vaccenic acid	64498.9	45612.3	42802.3
Oleic acid	111469	187900	149611
Guanosine	20335.1	23436	26911.1
Xanthosine	291229	108145	147759
Acacetin 7-[apiosyl(1->6)-glucoside]	1.11861e+06	1.41434e+06	1.45038e+06
Stearic acid	169487	108269	102810
Sodium Tetradecyl Sulfate	324.143	434	533.143
13-HOTE	107768	2206.43	2997.57
13-OxoODE	156487	1549.86	1552.57
12,13-EpOME	984163	59340.6	85321.1
Alpha-dimorphecolic acid	160376	3651.71	3556.29
9,10-Epoxystearic acid	93835	53902.1	46388.4
Chlordiazepoxide	572126	393452	581817
Eicosapentaenoic acid	757063	1.65586e+06	1.49265e+06
Arachidonic acid	1.42469e+07	1.59139e+07	1.50421e+07
ETrE(11Z, 14Z, 17Z)	302582	840076	655590
Glutathione	1879488	420988	436471
9(S)-HPOT	39056.4	137.571	253
Levonorgestrel	282.429	92.1429	94.2857
15-KETE	85220.4	1472.71	2066.86
15(S)-HETE	245190	33116.6	39664.4
12-HETE	83992	28386.7	40926.7
5-HETE	81667.3	8547	11164
Uridine 5'-monophosphate	649258	1.3191e+06	1.2275e+06
Docosahexaenoic acid	2.3369e+07	2.63155e+07	2.64478e+07
9,12,13-TriHOME	548318	4263.43	7456.57
8,15-DiHETE	12928.7	4636.57	3300.86
Gibberellin A3	6990.86	434.286	50.5714
Adenosine monophosphate	2.19886e+06	4.06562e+06	4.31627e+06
Imipenem	416618	538313	532934
20-Hydroxy-leukotriene B4	48476.4	1007.86	1423.57
Xanthohumol	98271.3	287508	275812
Prostaglandin F2a	39022.6	674.571	1280.43
Guanosine monophosphate	644201	994764	1.08391e+06
Riboflavin	19883.6	16381.6	17147.6
11,20-Dihydroxysugiol	32336.4	10060.9	6943.86
Oleandolide	26843.7	16859.3	21624
Deoxycholic acid	48377.9	22433.4	27177.1
7-Ketodeoxycholic acid	9186	869.857	3209
Cholic acid	97374.7	72103	96408.4
Hyocholate	130294	183396	133066
ADP	157057	332671	230103
N1,N10-Dicoumaroylspermidine	1088.86	2803.14	1456
Glycocholic acid	11764.4	8904.71	4152
LysoPE(18:0/0:0)	1.44992e+06	1.01951e+06	1.04986e+06
7-Sulfocholic acid	3293.29	19801.4	19713.9
Imatinib	55454.3	78402.9	55261.9
Leukotriene D4	37779.6	40260.1	30794.9
Tetrahydrocortisol	1.66927e+06	1.63536e+06	2.29655e+06
Maltotriose	243746	2023.71	3744.71
Taurocholic acid	667813	482423	805702
NAD	329563	579338	578432
Adenosine diphosphate ribose	1.73531e+06	683698	700591
Uridine diphosphate glucose	506987	1130431	782720
Uridine diphosphate-N-acetylgalactosamine	284008	507306	307659
Rutin	252.571	1091.86	1778.29
Oxidized glutathione	1.60696e+06	1.69202e+06	1.48936e+06
NADH	47514.4	317232	355391
Dephospho-CoA	129879	53939.7	60353.6
NADP	270249	458068	440406
SM(d18:1/16:0)	493445	354919	606475
PE(O-18:1(1Z)/20:4(5Z,8Z,11Z,14Z))	958750	70660.7	77751.7
PE(18:0/20:4(8Z,11Z,14Z,17Z))	365552	241902	221642
FAD	472003	577399	517536
PC(16:0/16:0)	412630	559781	481332

## Sheet: Bile acid
	Model	HMYR
norDCA	0.249356	0.238199
ω-MA	2.1297	3.8978
α-MA	1.67858	1.24895
β-MA	14.2652	6.64562
UDCA	0.829073	0.521926
HDCA	0.660342	0.432124
CDCA	0.301095	0.145226
DCA	1.44382	1.27319
CA	4.65344	7.78756
7-oxoCA	0.0480082	0.246883
3-oxoCA	0.280846	0.0809446
TUDCA	19.2522	15.2236
THDCA	25.847	14.8258
TCDCA	50.5315	32.1987
TDCA	34.5496	27.6909
TCA	428.543	637.329
Tω-MA	32.0826	53.1949
Tα-MA	53.3667	58.0783
Tβ-MA	243	201.146
